# Supplementary material for: The stress response gene ATF3 is a direct target of the Wnt/β-catenin pathway and inhibits the invasion and migration of HCT116 human colorectal cancer cells
Source: PubMed Central journal article supplement (PMC6028230; doi:10.1371/journal.pone.0194160), 2018-07-02

(a)

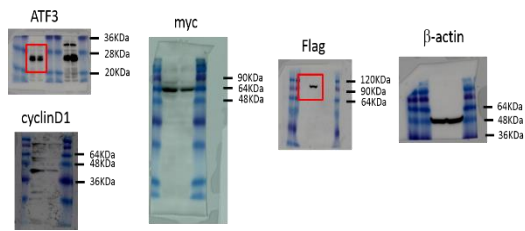

(b)

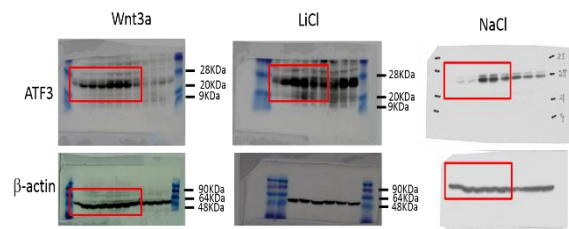

(c)

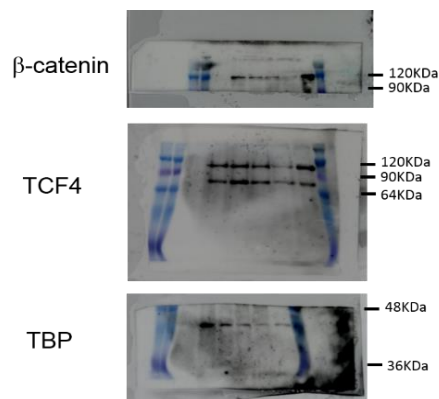

(d)

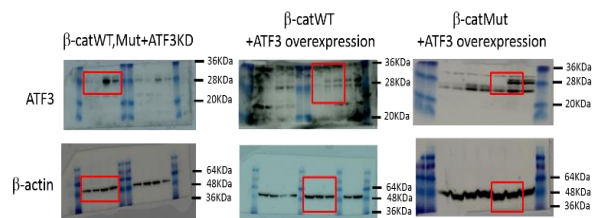

Supplement: pone.0194160.s006.pdf [file pone.0194160.s006.pdf]
